# Supplementary material for: Determinants in the LIN-12/Notch Intracellular Domain That Govern Its Activity and Stability During Caenorhabditis elegans Vulval Development
Source: PubMed Central journal article supplement (PMC5100865; doi:10.1534/g3.116.034363), 2016-09-16
Supplement: supp_g3.116.034363_TableS1.pdf [file supp_g3.116.034363_TableS1.pdf]

**Table S1. Plasmids generated in this study.**

| <b>Plasmid #</b> | <b>Construct</b>                                    |
|------------------|-----------------------------------------------------|
| p935             | lin-31p::lin-12(intra)::GFP                         |
| p937             | lin-31p::lin-12(intra-CPDmut)::GFP                  |
| p938             | lin-31p::lin-12(intra $\Delta$ (S4+Cterm))::GFP     |
| p939             | lin-31p::lin-12(intra $\Delta$ Cterm)::GFP          |
| p941             | lin-31p::lin-12(intra $\Delta$ PEST)::GFP           |
| p942             | lin-31p::GFP::lin-12(intra $\Delta$ (RAM+ANK))::GFP |
| p944             | lin-31p::lin-12(intra-RAMmut)::GFP                  |
| p945             | lin-31p::lin-12(intra[3])::GFP                      |
| p946             | lin-31p::lin-12(intra-S4mut)::GFP                   |
| p947             | lin-31p::lin-12(intra[2])::GFP                      |
| p948             | lin-31p::lin-12(intra $\Delta$ 144bp)::GFP          |
| p949             | lin-31p::lin-12(intra-SPEYMut)::GFP                 |
| p951             | lin-31p::lin-12(intra $\Delta$ TTHTTPTS)::GFP       |
| p960             | lin-31p::lin-12(intra-Y1375A)::GFP                  |
| p963             | lin-31p::lin-12(intra-Y1375F)::GFP                  |
| p964             | lin-31p::lin-12(intra-LLmut)::GFP                   |

For transgenes generated with these constructs, see Table S3.
