# Supplementary material for: Determinants in the LIN-12/Notch Intracellular Domain That Govern Its Activity and Stability During Caenorhabditis elegans Vulval Development
Source: PubMed Central journal article supplement (PMC5100865; doi:10.1534/g3.116.034363), 2016-09-16
Supplement: supp_g3.116.034363_TableS2.pdf [file supp_g3.116.034363_TableS2.pdf]

**Table S2. Plasmids and primers used to make constructs in Table 1.**

| oYD        | Plasmid Used | Sequence                                                                                |
|------------|--------------|-----------------------------------------------------------------------------------------|
|            |              |                                                                                         |
| oYD45      | All          | GCTCTTCATCAAGCGGCTGC                                                                    |
| oYD47      | p941         | GCTGGCGGCCGCCGACCTTTGTATAGTTCATCCATGCC                                                  |
| oYD48      | All          | AAAGATCTTTGTCTCGAGAATCCATGC                                                             |
| oYD52      | p941         | GCTGGCGGCCGCTCAACCTTTGTATAGTTCATCCATGCC                                                 |
| oYD53      | p938         | GCTGGCGGCCGCTCAATCCGATGGTGGAGGTGTCAG                                                    |
| oYD54      | p939         | GCTGGCGGCCGCTCACTGTGGTGACGGTGTTGACG                                                     |
| oYD56      | p942         | CGCCAGATCTACCGGTAGAAAAATGAGTAAAGGAGAAGAAGCTTTTCACTGG                                    |
| oYD57      | p946         | gatggaGcaGcgGcaGcaGcgGcaccacagcattttatgaataccactcatactacacc                             |
| oYD58      | p946         | cttggtgCcgCtgCtgCcgCtgCtccatccgatggtggaggtg                                             |
| oYD59      | p947         | ccgaaccagctcattattttATGAGTAAAGGAGAAGAAGCTTTTCACTGGAG                                    |
| oYD60      | p947         | AGTTCTTCTCCTTTACTCATaaaataatgagctggttcggagtatcgc                                        |
| oYD61      | p947         | GCTGGCGGCCGCTcaACCTTTGTATAGTTCATCCATGCCATGTG                                            |
| oYD63      | p945         | cttcgactgtctgtttcttcggagcACCTTTGTATAGTTCATCCATGCCATGTG                                  |
| oYD64      | p945         | agtctcgagaattggaagctgactctttttgcttcgactgtctgtttcttcggagcACCTTTGTATAGTTCATCCATGCCATGTG   |
| oYD65      | p944         | acgctctgtcGCgGCgGcacctatggagaatgaggagaagaatcgg                                          |
| oYD66      | p944         | gccagatctatgggaaatcggacaaggaaactcgaatgatcaacgctctgtcGCgGCgGcacctatgagaatgaggagaagaatcgg |
| oYD69      | p949         | ttgaGCtGctgCgGCcaaactagttcaaactcgtcggtgtagtatg                                          |
| oYD70      | p949         | ttgGCcGcagCaGCtcaaactgaagctggaagctcagaag                                                |
| oYD71      | p948         | gctggcgccgctcattgatattctgggctcaaactagttcaaactcg                                         |
| oYD82      | p951         | cattttatgaatttgaactatttgagcccagaatatcaaactg                                             |
| oYD83      | p951         | caaactagttcaaattcataaaatgctgtggtgacggtg                                                 |
| oYD96      | p960         | gacgagtttgaacGctttgagcccagaatatcaaactgaagc                                              |
| oYD97      | p960         | ttctgggctcaaaGCgttcaaactcgtcggtgtagtatgagtg                                             |
| oYD10<br>6 | p963         | gacgagtttgaactTtttgagcccagaatatcaaactgaagc                                              |
| oYD10<br>7 | p963         | ttctgggctcaaaAagttcaaactcgtcggtgtagtatgagtg                                             |
