# Supplementary material for: Determinants in the LIN-12/Notch Intracellular Domain That Govern Its Activity and Stability During Caenorhabditis elegans Vulval Development
Source: PubMed Central journal article supplement (PMC5100865; doi:10.1534/g3.116.034363), 2016-09-16
Supplement: supp_g3.116.034363_TableS3.pdf [file supp_g3.116.034363_TableS3.pdf]

**Table S3. Strains and transgenes generated in this study.**

| Name   | Genotype                      | Construct               | Figure |
|--------|-------------------------------|-------------------------|--------|
| GS7374 | <i>pha-1(e2123); arEx1992</i> | canonical intra::GFP    | 2      |
| GS7375 | <i>pha-1(e2123); arEx1993</i> | canonical intra::GFP    | 2      |
| GS8310 | <i>pha-1(e2123); arEx2427</i> | intra-CPDmut            | 3      |
| GS8311 | <i>pha-1(e2123); arEx2428</i> | intra-CPDmut            | 3      |
| GS8312 | <i>pha-1(e2123); arEx2429</i> | intra-CPDmut            | 3      |
| GS8313 | <i>pha-1(e2123); arEx2430</i> | intra $\Delta$ S4+Cterm | 4      |
| GS8314 | <i>pha-1(e2123); arEx2431</i> | intra $\Delta$ S4+Cterm | 4      |
| GS8315 | <i>pha-1(e2123); arEx2432</i> | intra $\Delta$ S4+Cterm | 4      |
| GS8316 | <i>pha-1(e2123); arEx2433</i> | intra $\Delta$ Cterm    | 4      |
| GS8317 | <i>pha-1(e2123); arEx2434</i> | intra $\Delta$ Cterm    | 4      |
| GS8318 | <i>pha-1(e2123); arEx2435</i> | intra $\Delta$ Cterm    | 4      |
| GS8323 | <i>pha-1(e2123); arEx2439</i> | intra $\Delta$ P        | 2      |
| GS8324 | <i>pha-1(e2123); arEx2440</i> | intra $\Delta$ P        | 2      |
| GS8325 | <i>pha-1(e2123); arEx2441</i> | intra $\Delta$ P        | 2      |
| GS8326 | <i>pha-1(e2123); arEx2442</i> | intra $\Delta$ RAM+ANK  | 6      |
| GS8327 | <i>pha-1(e2123); arEx2443</i> | intra $\Delta$ RAM+ANK  | 6      |
| GS8328 | <i>pha-1(e2123); arEx2444</i> | intra $\Delta$ RAM+ANK  | 6      |
| GS8332 | <i>pha-1(e2123); arEx2448</i> | intra-RAMmut            | 6      |
| GS8333 | <i>pha-1(e2123); arEx2449</i> | intra-RAMmut            | 6      |
| GS8334 | <i>pha-1(e2123); arEx2450</i> | intra-RAMmut            | 6      |
| GS8335 | <i>pha-1(e2123); arEx2451</i> | intra[3]                | 2      |
| GS8336 | <i>pha-1(e2123); arEx2452</i> | intra[3]                | 2      |
| GS8337 | <i>pha-1(e2123); arEx2453</i> | intra[3]                | 2      |
| GS8338 | <i>pha-1(e2123); arEx2454</i> | intra-S4mut             | 3      |
| GS8339 | <i>pha-1(e2123); arEx2455</i> | intra-S4mut             | 3      |
| GS8340 | <i>pha-1(e2123); arEx2456</i> | intra-S4mut             | 3      |
| GS8341 | <i>pha-1(e2123); arEx2457</i> | intra[2]                | 2      |
| GS8342 | <i>pha-1(e2123); arEx2458</i> | intra[2]                | 2      |
| GS8343 | <i>pha-1(e2123); arEx2459</i> | intra[2]                | 2      |
| GS8344 | <i>pha-1(e2123); arEx2460</i> | intra-SPEYmut           | 5      |
| GS8345 | <i>pha-1(e2123); arEx2461</i> | intra-SPEYmut           | 5      |
| GS8346 | <i>pha-1(e2123); arEx2462</i> | intra-SPEYmut           | 5      |

|        |                               |                         |   |
|--------|-------------------------------|-------------------------|---|
| GS8347 | <i>pha-1(e2123); arEx2463</i> | intra $\Delta$ TTHTTPTS | 5 |
| GS8348 | <i>pha-1(e2123); arEx2464</i> | intra $\Delta$ TTHTTPTS | 5 |
| GS8349 | <i>pha-1(e2123); arEx2465</i> | intra $\Delta$ TTHTTPTS | 5 |
| GS8360 | <i>pha-1(e2123); arEx2476</i> | intra-Y1375A            | 5 |
| GS8361 | <i>pha-1(e2123); arEx2477</i> | intra-Y1375A            | 5 |
| GS8362 | <i>pha-1(e2123); arEx2478</i> | intra-Y1375A            | 5 |
| GS8363 | <i>pha-1(e2123); arEx2479</i> | intra-Y1375F            | 5 |
| GS8364 | <i>pha-1(e2123); arEx2480</i> | intra-Y1375F            | 5 |
| GS8365 | <i>pha-1(e2123); arEx2481</i> | intra-Y1375F            | 5 |
| GS8366 | <i>pha-1(e2123); arEx2482</i> | intra-LLmut             | 5 |
| GS8367 | <i>pha-1(e2123); arEx2483</i> | intra-LLmut             | 5 |
| GS8368 | <i>pha-1(e2123); arEx2484</i> | intra-LLmut             | 5 |

All constructs express forms of LIN-12(intra) tagged with GFP. Except for “intra[2]” and “intra[3],” the GFP tag is inserted as in the canonical “intra::GFP” as described in the text and Fig. 2.
